# Supplementary material for: Host Range and Impact of Dichrorampha aeratana, the First Potential Biological Control Agent for Leucanthemum vulgare in North America and Australia
Source: MDPI journal article supplement (doi:10.3390/insects12050438), 2021-05-12
Supplement: s1 [file s1]

**Supplementary Materials Table S1:** Populations of *Leucanthemum vulgare* and *L. ircutianum* used as control plants for no-choice larval development tests conducted at CABI from 2011 to 2020. All plants were infested with five larvae in spring and dissected for larvae in autumn.

| <i>Leucanthemum</i><br>species | Origin           | Population code | No.<br>replicates | % larvae recovered<br>/ plant (mean $\pm$ SE) |
|--------------------------------|------------------|-----------------|-------------------|-----------------------------------------------|
| North America (Canada)         |                  |                 |                   |                                               |
| <i>L. vulgare</i>              | Alberta          | Banff2          | 11                | 41.8 $\pm$ 5.0                                |
| <i>L. vulgare</i>              | Alberta          | Banff3          | 13                | 50.8 $\pm$ 11.5                               |
| <i>L. vulgare</i>              | Alberta          | Banff5          | 3                 | 66.7 $\pm$ 17.6                               |
| <i>L. vulgare</i>              | Alberta          | TP 223          | 3                 | 33.3 $\pm$ 17.6                               |
| <i>L. vulgare</i>              | British Columbia | Coast #2        | 8                 | 55.0 $\pm$ 9.8                                |
| <i>L. vulgare</i>              | British Columbia | Lone Butte      | 9                 | 62.2 $\pm$ 10.2                               |
| <i>L. vulgare</i>              | British Columbia | CAN2            | 12                | 55.0 $\pm$ 9.3                                |
| <i>L. vulgare</i>              | British Columbia | Wavey           | 24                | 45.8 $\pm$ 7.2                                |
| <i>L. vulgare</i>              | Ontario          | Moos            | 2                 | 20.0 $\pm$ 0.0                                |
| North America (USA)            |                  |                 |                   |                                               |
| <i>L. vulgare</i>              | Colorado         | Douglas         | 16                | 62.5 $\pm$ 6.6                                |
| <i>L. vulgare</i>              | Idaho            | US16            | 4                 | 45.0 $\pm$ 9.6                                |
| <i>L. vulgare</i>              | Minnesota        | SRLSP           | 4                 | 40.0 $\pm$ 21.6                               |
| <i>L. vulgare</i>              | Minnesota        | USA5            | 12                | 51.7 $\pm$ 10.0                               |
| <i>L. vulgare</i>              | Montana          | Nine Pine       | 7                 | 57.1 $\pm$ 11.1                               |
| <i>L. vulgare</i>              | Montana          | USA2            | 12                | 56.7 $\pm$ 7.3                                |
| <i>L. vulgare</i>              | Oregon           | USA1            | 12                | 53.3 $\pm$ 7.5                                |
| <i>L. vulgare</i>              | Washington       | US2             | 4                 | 40.0 $\pm$ 11.5                               |
| <i>L. vulgare</i>              | Washington       | US6             | 2                 | 60.0 $\pm$ 0.0                                |
| <i>L. vulgare</i>              | Wyoming          | Wiggins Fork    | 6                 | 43.3 $\pm$ 3.3                                |
| Australia                      |                  |                 |                   |                                               |
| <i>L. vulgare</i>              | New South Wales  | AUS             | 28                | 56.4 $\pm$ 5.1                                |
| Europe                         |                  |                 |                   |                                               |
| <i>L. vulgare</i>              | Czech Republic   | CZ25            | 14                | 50.0 $\pm$ 10.8                               |
| <i>L. vulgare</i>              | Germany          | DE7             | 12                | 40.0 $\pm$ 7.0                                |
| <i>L. vulgare</i>              | Poland           | PL3VUL          | 12                | 61.7 $\pm$ 8.7                                |
| <i>L. vulgare</i>              | Romania          | RO5             | 12                | 40.0 $\pm$ 7.0                                |
| North America (Canada)         |                  |                 |                   |                                               |
| <i>L. ircutianum</i>           | British Columbia | Barriere Lakes  | 15                | 56.0 $\pm$ 8.3                                |
| <i>L. ircutianum</i>           | British Columbia | Telegr. Creek   | 21                | 41.0 $\pm$ 5.9                                |
| Europe                         |                  |                 |                   |                                               |
| <i>L. ircutianum</i>           | Switzerland      | CH5             | 12                | 53.3 $\pm$ 7.9 <sup>a</sup>                   |
| <i>L. ircutianum</i>           | Czech Republic   | CZ1             | 42                | 45.2 $\pm$ 3.9                                |
| <i>L. ircutianum</i>           | Czech Republic   | CZ29            | 15                | 33.3 $\pm$ 6.1                                |
| <i>L. ircutianum</i>           | France           | FR2             | 12                | 33.3 $\pm$ 8.3                                |
| <i>L. ircutianum</i>           | Poland           | PL3IRC          | 12                | 38.3 $\pm$ 10.0                               |
| <i>L. ircutianum</i>           | Romania          | RO7             | 12                | 60.0 $\pm$ 10.4                               |
